# Supplementary material for: Associations of Ultra-Processed Food Intake with Body Fat and Skeletal Muscle Mass by Sociodemographic Factors
Source: PubMed Central journal article supplement — Diabetes Metab J. 2024 Feb 2;48(4):780–9. doi: 10.4093/dmj.2023.0335 (PMC11307108; doi:10.4093/dmj.2023.0335), 2024-02-02
Supplement: dmj-2023-0335-Supplementary-Fig-1.pdf [file dmj-2023-0335-Supplementary-Fig-1.pdf]

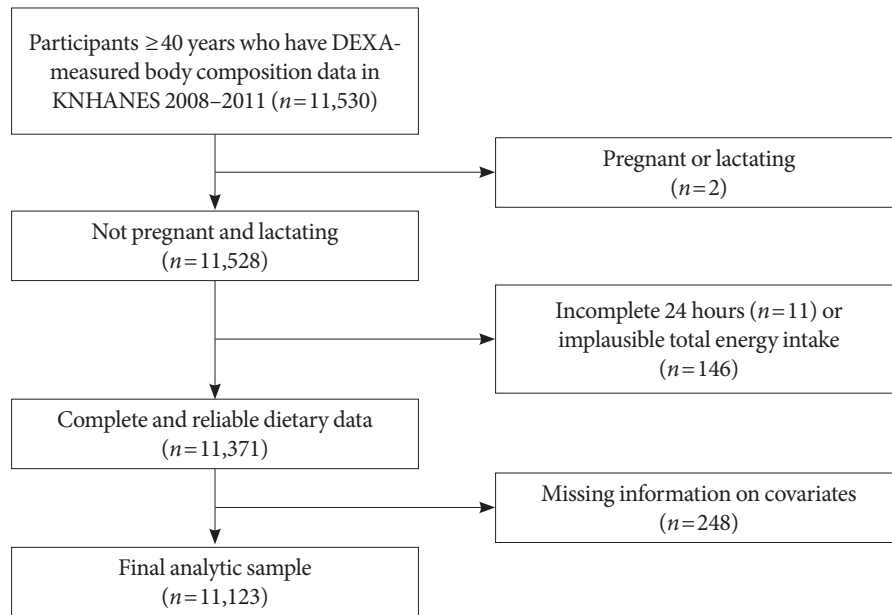

**Supplementary Fig. 1.** Study participant flow chart, Korea National Health and Nutrition Examination Survey (KNHANES) 2008 to 2011. DEXA, dual-energy X-ray absorptiometry.
