# Supplementary material for: Associations of Ultra-Processed Food Intake with Body Fat and Skeletal Muscle Mass by Sociodemographic Factors
Source: PubMed Central journal article supplement — Diabetes Metab J. 2024 Feb 2;48(4):780–9. doi: 10.4093/dmj.2023.0335 (PMC11307108; doi:10.4093/dmj.2023.0335), 2024-02-02
Supplement: dmj-2023-0335-Supplementary-Table-1.pdf [file dmj-2023-0335-Supplementary-Table-1.pdf]

**Supplementary Table 1.** Nutritional characteristics by ultra-processed food intake quartiles

| Characteristic                       | UPF intake quartiles |            |            |           | P value <sup>c</sup> |
|--------------------------------------|----------------------|------------|------------|-----------|----------------------|
|                                      | Q1                   | Q2         | Q3         | Q4        |                      |
| <b>Nutrient density<sup>a</sup></b>  |                      |            |            |           |                      |
| Fiber, g                             | 4.9±0.1              | 4.5±0.1    | 4.2±0.1    | 3.6±0.1   | <0.0001              |
| Calcium, mg                          | 280.3±4.3            | 291.8±6.5  | 275.0±3.8  | 237.1±3.6 | <0.0001              |
| Phosphorous, mg                      | 655.3±3.9            | 648.0±3.6  | 610.9±3.4  | 531.8±3.3 | <0.0001              |
| Iron, mg                             | 8.7±0.2              | 9.0±0.2    | 8.2±0.1    | 7.0±0.2   | <0.0001              |
| Sodium, mg                           | 2,612±44             | 2,685±40   | 2,595±32   | 2,539±32  | 0.0318               |
| Potassium, mg                        | 1,768±21             | 1,709±15   | 1,624±16   | 1,392±13  | <0.0001              |
| Vitamin A, µgRE                      | 462.2±15.1           | 436.5±11.4 | 429.7±13.0 | 334.1±7.7 | <0.0001              |
| Carotene, µg                         | 2,572±88             | 2,332±66   | 2,275±74   | 1,724±44  | <0.0001              |
| Vitamin B <sub>1</sub> , mg          | 0.64±0.01            | 0.66±0.01  | 0.65±0.01  | 0.60±0.01 | <0.0001              |
| Vitamin B <sub>2</sub> , mg          | 0.56±0.01            | 0.59±0.01  | 0.59±0.01  | 0.55±0.01 | <0.0001              |
| Niacin, mg                           | 8.1±0.1              | 8.6±0.1    | 8.4±0.1    | 7.5±0.1   | <0.0001              |
| Vitamin C, mg                        | 63.6±1.3             | 59.9±1.1   | 56.8±1.1   | 45.4±0.9  | <0.0001              |
| <b>Food group intake<sup>b</sup></b> |                      |            |            |           |                      |
| Grains                               | 312.6±2.7            | 291.8±2.3  | 291.9±3.0  | 318.2±3.8 | <0.0001              |
| Potatoes                             | 51.0±3.9             | 44.2±3.1   | 33.3±2.2   | 22.4±2.2  | <0.0001              |
| Sugars                               | 5.0±0.2              | 7.9±0.3    | 8.9±0.4    | 7.6±0.4   | <0.0001              |
| Legumes                              | 43.1±2.0             | 42.9±1.9   | 44.0±2.1   | 31.4±2.0  | <0.0001              |
| Nuts                                 | 4.9±0.7              | 7.1±1.9    | 4.2±0.7    | 1.7±0.8   | 0.0056               |
| Vegetables                           | 371.6±5.9            | 360.4±5.8  | 342.7±6.4  | 281.8±5.1 | <0.0001              |
| Mushrooms                            | 4.9±0.5              | 3.8±0.4    | 4.3±0.5    | 2.5±0.3   | 0.0008               |
| Fruits                               | 242.2±15.2           | 208.8±9.4  | 179.7±8    | 107.2±6.1 | <0.0001              |
| Seaweeds                             | 6.3±0.5              | 6.7±0.5    | 5.5±0.4    | 3.8±0.3   | <0.0001              |
| Meats                                | 53.1±2.5             | 83.7±3.8   | 78.3±3.0   | 58.6±2.9  | <0.0001              |
| Eggs                                 | 11.2±0.7             | 16.1±1.0   | 16.8±0.8   | 17.6±0.9  | <0.0001              |
| Seafoods                             | 50.5±2.1             | 55.3±2.1   | 57.1±2.3   | 47.8±2.2  | 0.0091               |
| Dairy products                       | 44.0±3.3             | 55.9±3.5   | 66.3±4.4   | 59.1±3.5  | <0.0001              |

Values are presented as mean ± standard error.

UPF, ultra-processed food; Q, quartile; µgRE, µg retinol equivalents.

<sup>a</sup>Nutrient density is expressed as each nutrient intake per 1,000 kcal, and values were obtained using the general linear model after adjusting for age and sex and weighted, <sup>b</sup>Food group intake is expressed as g/day, and values were obtained using the general linear model after adjusting for age, sex, and total energy intake and weighted, <sup>c</sup>P values for differences between quartile 1 and quartile 4 are determined using a two-sample *t*-test.
